# Supplementary material for: Quality Specific Associations of Carbohydrate Consumption and Frailty Index
Source: MDPI journal article supplement (doi:10.3390/nu14235072), 2022-11-29
Supplement: s1 [file s1]

**Table S1.** Characteristic difference in those with and without follow up data

|                           | <b>No<br/>follow<br/>up</b> |          | <b>Longitudinal<br/>Analysis</b> |          | <b>p-<br/>value</b> |
|---------------------------|-----------------------------|----------|----------------------------------|----------|---------------------|
| n                         | 208                         |          | 816                              |          |                     |
| Frailty Index             | 0.15                        | (0.12)   | 0.1                              | (0.06)   | <0.001              |
| Age (years)               | 74.84                       | (9.65)   | 73.78                            | (7.33)   | 0.084               |
| Sex (%men)                | 104                         | (50.00)  | 397                              | (48.70)  | 0.788               |
| Diabetes                  | 34                          | (16.30)  | 100                              | (12.30)  | 0.148               |
| Fasting glucose (mg/dL)   | 92.89                       | (22.15)  | 91.81                            | (17.19)  | 0.448               |
| HBA1C (%)                 | 5.94                        | (0.74)   | 5.84                             | (0.56)   | 0.07                |
| BMI (kg/m2)               | 27.14                       | (5.12)   | 26.87                            | (4.45)   | 0.452               |
| Total energy (kcal)       | 2008.95                     | (728.43) | 1939.5                           | (657.46) | 0.184               |
| Glycemic load (g/day)     | 113.05                      | (47.05)  | 106.14                           | (41.53)  | 0.037               |
| Total grain (serv/day)    | 6.18                        | (2.96)   | 5.97                             | (2.57)   | 0.307               |
| Whole grains (serv/day)   | 1.77                        | (1.28)   | 1.82                             | (1.10)   | 0.513               |
| Nonwhole grain (serv/day) | 4.41                        | (2.42)   | 4.15                             | (2.11)   | 0.112               |
| Fiber:Carbohydrate        | 0.09                        | (0.03)   | 0.1                              | (0.02)   | 0.62                |
| Fiber (g/day)             | 21.86                       | (8.74)   | 20.68                            | (7.75)   | 0.055               |
| % energy from             |                             |          |                                  |          |                     |
| Carbohydrate              | 47.56                       | (8.48)   | 45.95                            | (6.96)   | 0.004               |
| % energy from PUFA        | 7.73                        | (2.19)   | 7.96                             | (1.59)   | 0.078               |
| % energy from MUFA        | 12.38                       | (2.73)   | 12.81                            | (2.02)   | 0.01                |
| % energy from SFA         | 10.63                       | (2.87)   | 11.08                            | (2.20)   | 0.014               |

**Table S2. Interactions between carbohydrate intake and time on trajectories of frailty index.**

|                     | Men & Women |         |       | Men     |         |       | Women   |         |       |
|---------------------|-------------|---------|-------|---------|---------|-------|---------|---------|-------|
|                     | b           | (SE)    | p     | b       | (SE)    | p     | b       | (SE)    | p     |
| % Carbohydrate      |             |         |       |         |         |       |         |         |       |
| Med*follow-up time  | 0.0001      | (0.001) | 0.938 | -0.0009 | (0.001) | 0.402 | 0.0011  | (0.001) | 0.324 |
| High*follow-up time | 0.0003      | (0.001) | 0.710 | -0.0009 | (0.001) | 0.442 | 0.0015  | (0.001) | 0.204 |
| Glycemic Load       |             |         |       |         |         |       |         |         |       |
| Med*follow-up time  | 0.0004      | (0.001) | 0.570 | -0.0010 | (0.001) | 0.400 | 0.0013  | (0.001) | 0.178 |
| High*follow-up time | 0.0001      | (0.001) | 0.879 | -0.0017 | (0.001) | 0.136 | 0.0021  | (0.001) | 0.067 |
| Total Grains        |             |         |       |         |         |       |         |         |       |
| Med*follow-up time  | -0.0001     | (0.001) | 0.867 | -0.0002 | (0.001) | 0.863 | 0.0000  | (0.001) | 0.993 |
| High*follow-up time | -0.0009     | (0.001) | 0.259 | -0.0011 | (0.001) | 0.328 | -0.0005 | (0.001) | 0.675 |
| Whole Grains        |             |         |       |         |         |       |         |         |       |
| Med*follow-up time  | -0.0004     | (0.001) | 0.597 | -0.0006 | (0.001) | 0.586 | -0.0002 | (0.001) | 0.857 |
| High*follow-up time | -0.0012     | (0.001) | 0.114 | -0.0011 | (0.001) | 0.310 | -0.0012 | (0.001) | 0.249 |
| Non-whole grains    |             |         |       |         |         |       |         |         |       |
| Med*follow-up time  | 0.0003      | (0.001) | 0.640 | 0.0009  | (0.001) | 0.445 | 0.0000  | (0.001) | 0.980 |
| High*follow-up time | 0.0001      | (0.001) | 0.907 | 0.0001  | (0.001) | 0.950 | 0.0007  | (0.001) | 0.566 |
| Fiber:Carbohydrate  |             |         |       |         |         |       |         |         |       |
| Med*follow-up time  | -0.0009     | (0.001) | 0.235 | -0.0002 | (0.001) | 0.857 | -0.0020 | (0.001) | 0.098 |
| High*follow-up time | -0.0015     | (0.001) | 0.051 | -0.0004 | (0.001) | 0.738 | -0.0030 | (0.001) | 0.009 |

Data represents beta estimates from carbohydrate\*time term in the mixed effects model
